# Supplementary material
Source: PubMed Central journal article supplement (PMC6507416)
Supplement: NIHMS1507789-supplement-4.pdf [file NIHMS1507789-supplement-4.pdf]

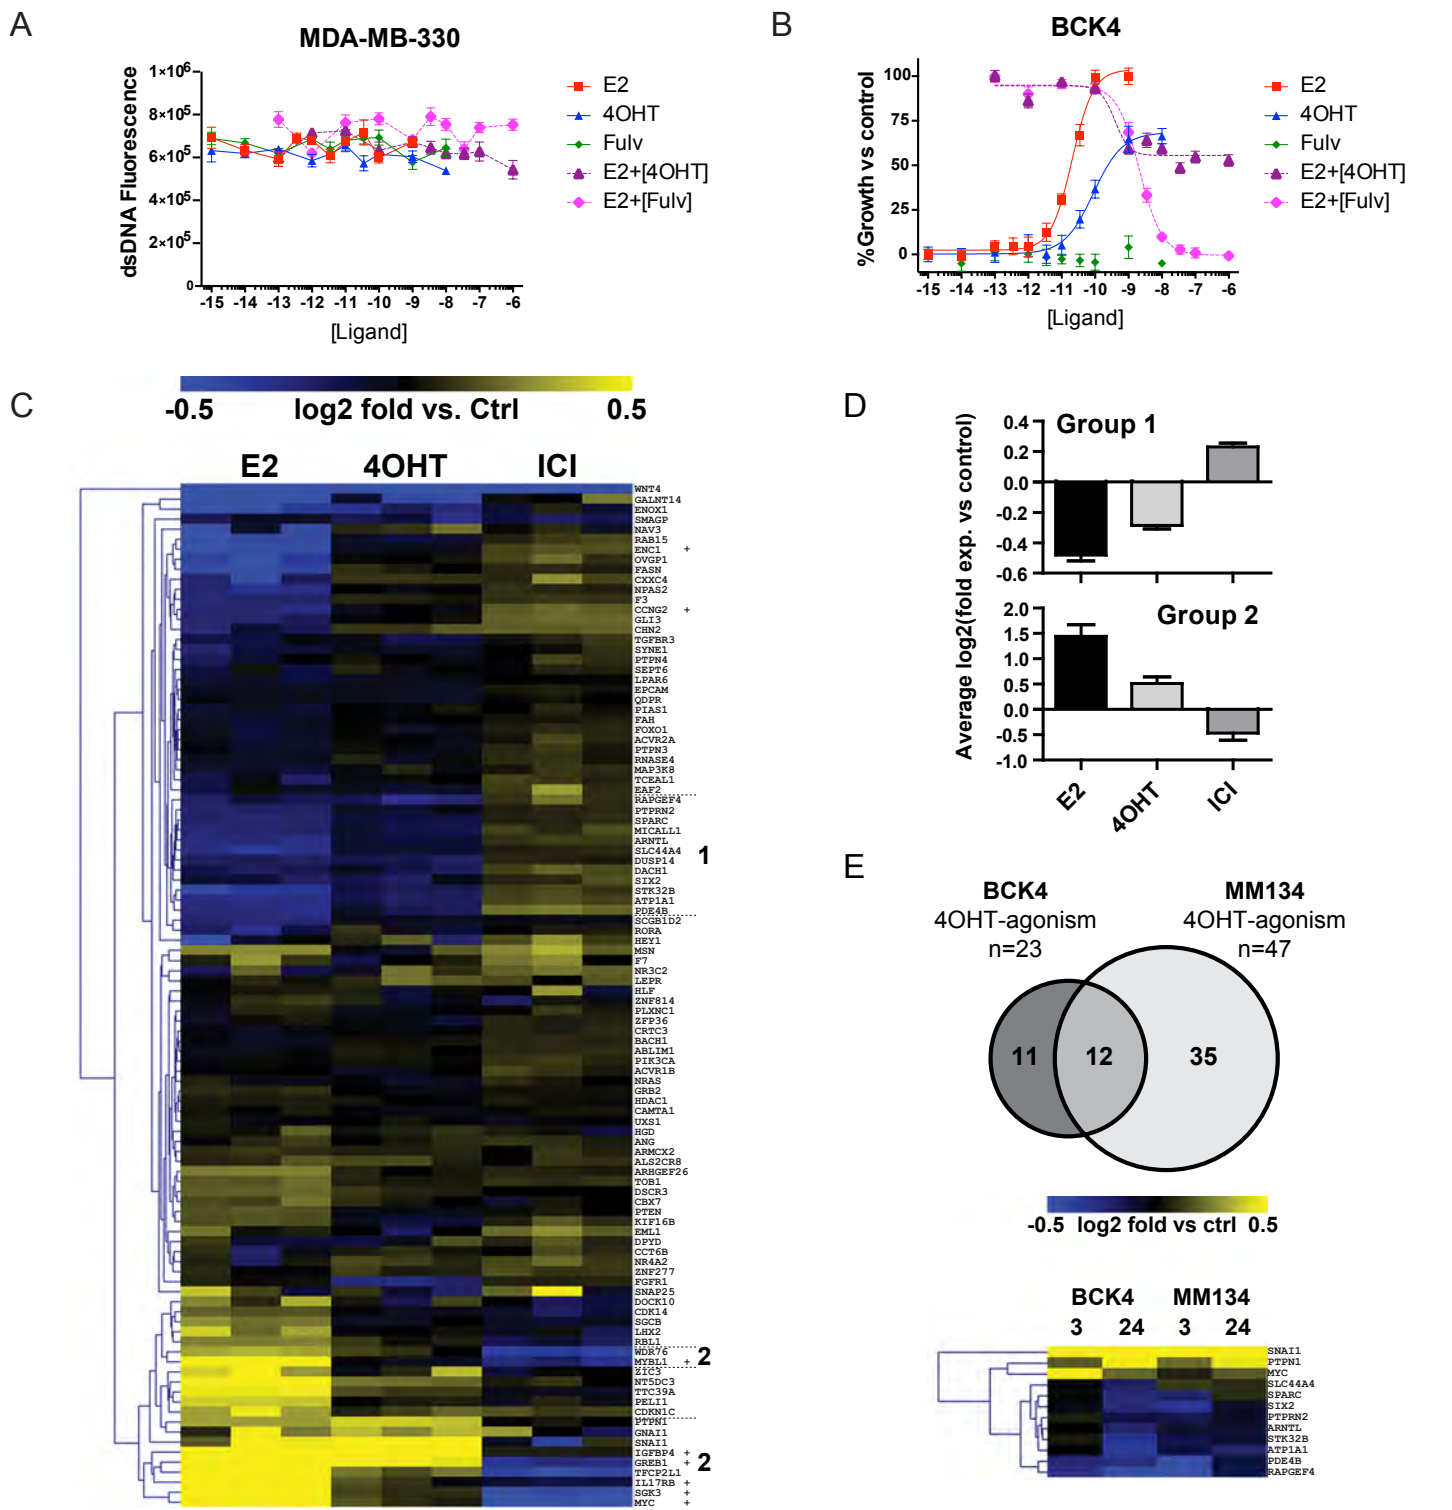

**Figure S1. Estrogen and anti-estrogen response of MDA-MB-330 and BCK4 cells.** **A-B.** Estrogen and anti-estrogen dose response in **(A)** MDA-MB-330 (6 days) and **(B)** BCK4 (7 days) cells. E2: Estradiol (100 pM); 4-OHT: 4-hydroxytamoxifen (100 nM); Fulv: Fulvestrant (ICI 182, 780, 100 nM). Graphs show representative data (n=6) from two-three experiments. BCK4 data was expressed as the maximum versus minimum growth for either treatment context. **C.** Nanostring-based expression of ILC E2-regulated gene code-set (from ref. 15) in BCK4 cells with the indicated treatments for 24hrs. Genes were excluded from analysis if all treatment groups had average raw expression counts <24. +, canonical ER target gene. Control: vehicle (Ethanol). **D.** Bars represent average fold change for all genes in the indicated group  $\pm$  SEM. **E.** Top, Genes from groups 1 and 2 were overlapped with genes previously identified as being regulated by tamoxifen as an agonist (ref. 15). Bottom, Cells were treated as described above with 1 $\mu$ M 4OHT for 3 or 24hrs. BCK4 data are repeated from **(C)**.

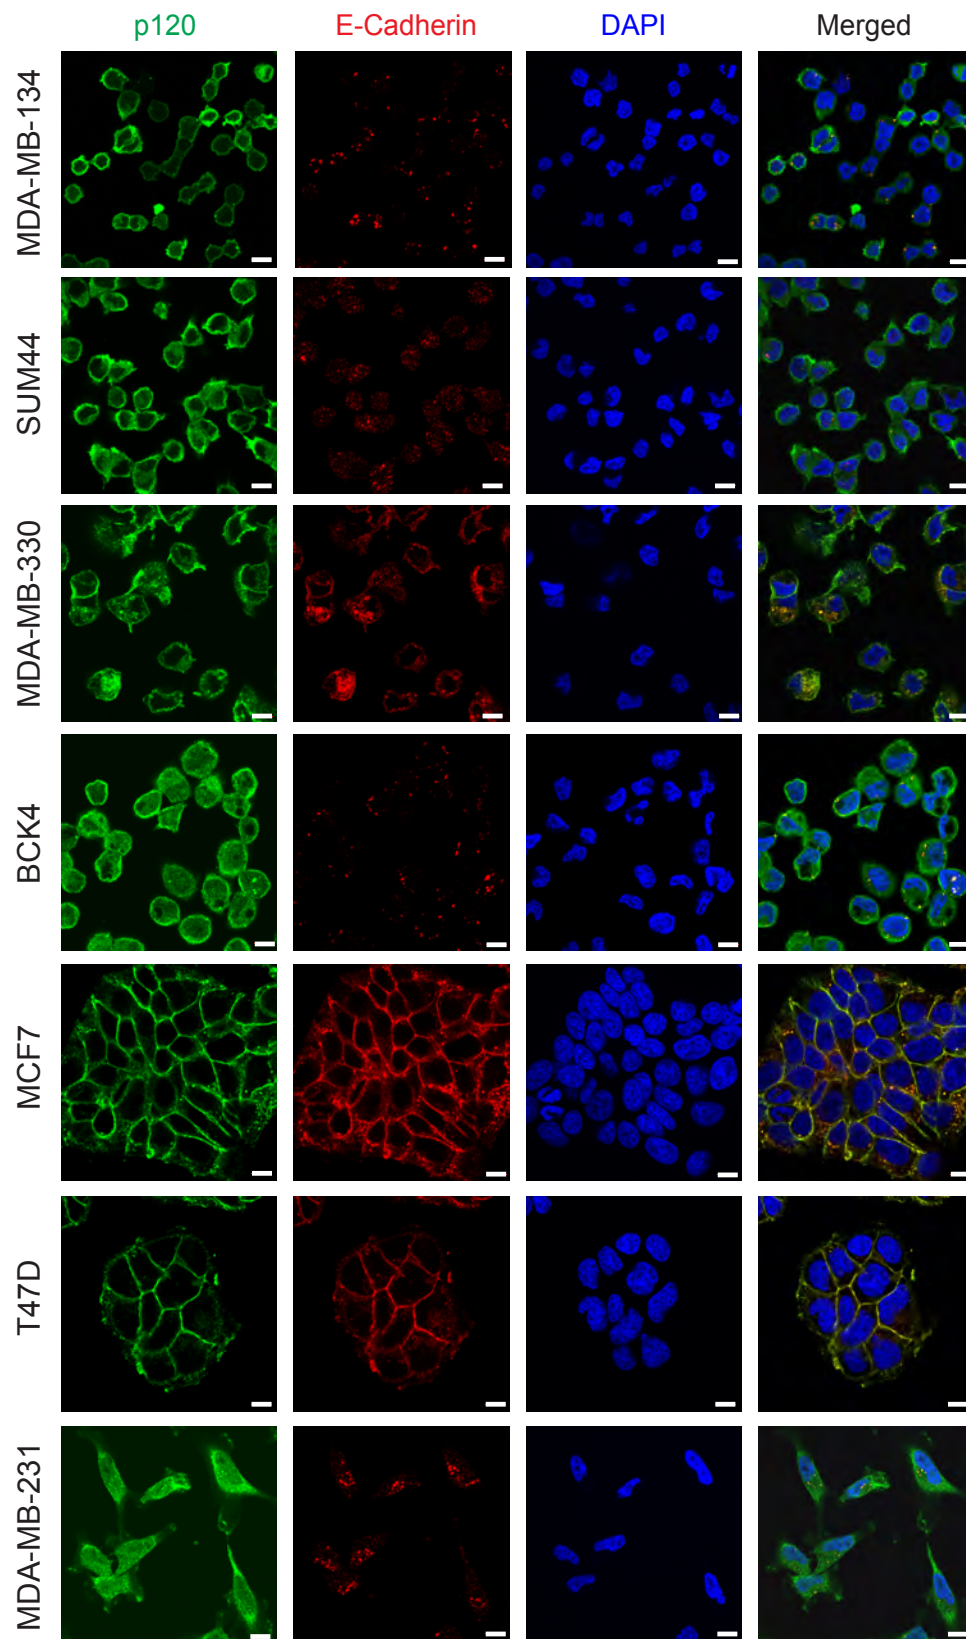

**Figure S2. p120 and E-cadherin co-immunofluorescence staining in ILC and IDC cells.** p120 (green), E-cadherin (red), DAPI (blue) and merged co-immunofluorescence images of ILC and IDC cell lines. Scale bar: 10  $\mu$ m.

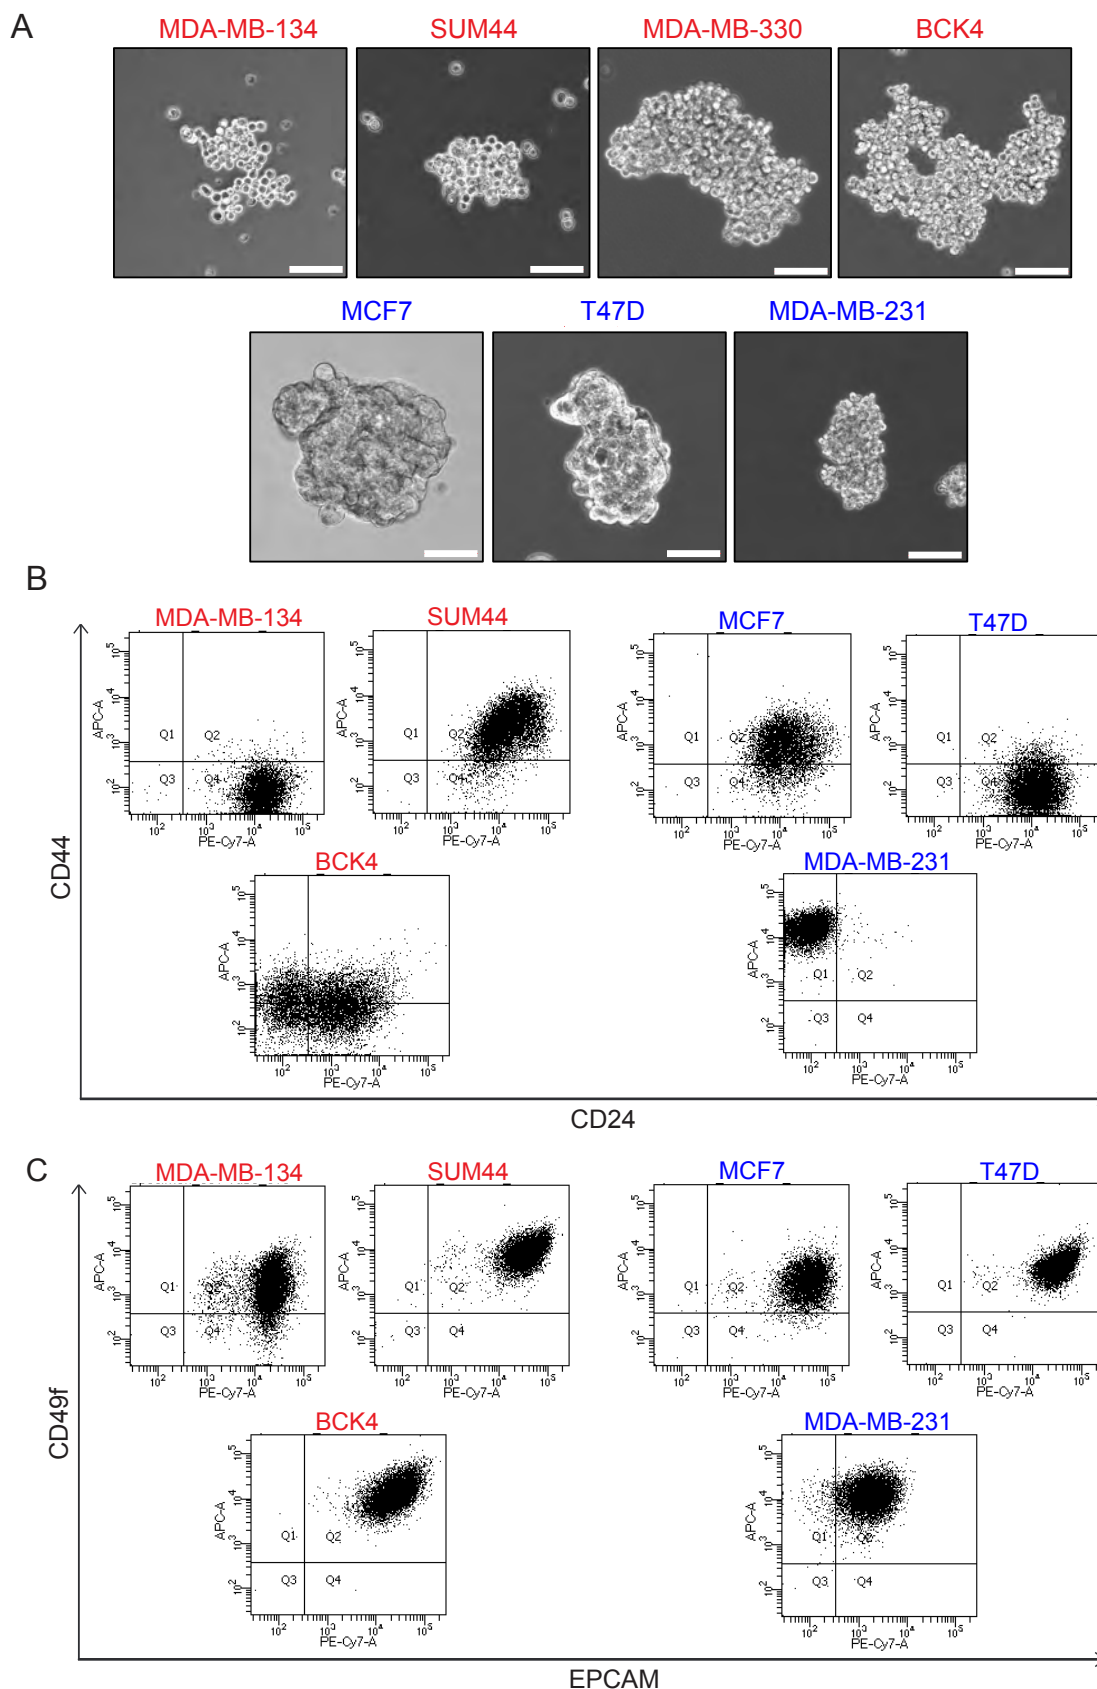

**Figure S3. Human ILC cell lines do not form robust mammospheres.** **A.** Phase contrast light microscopy images of mammospheres from ILC (red; top) and IDC (blue; bottom) cell lines in 6-well 2D and ULA plates 7 days post plating. Scale bar: 100 μm. **B-C.** FACS plots of ILC (red; left) and IDC (blue; right) cell lines co-stained for **(B)** CD44/CD24 and **(C)** CD49f/EPCAM. Gating was done using isotype-stained samples.

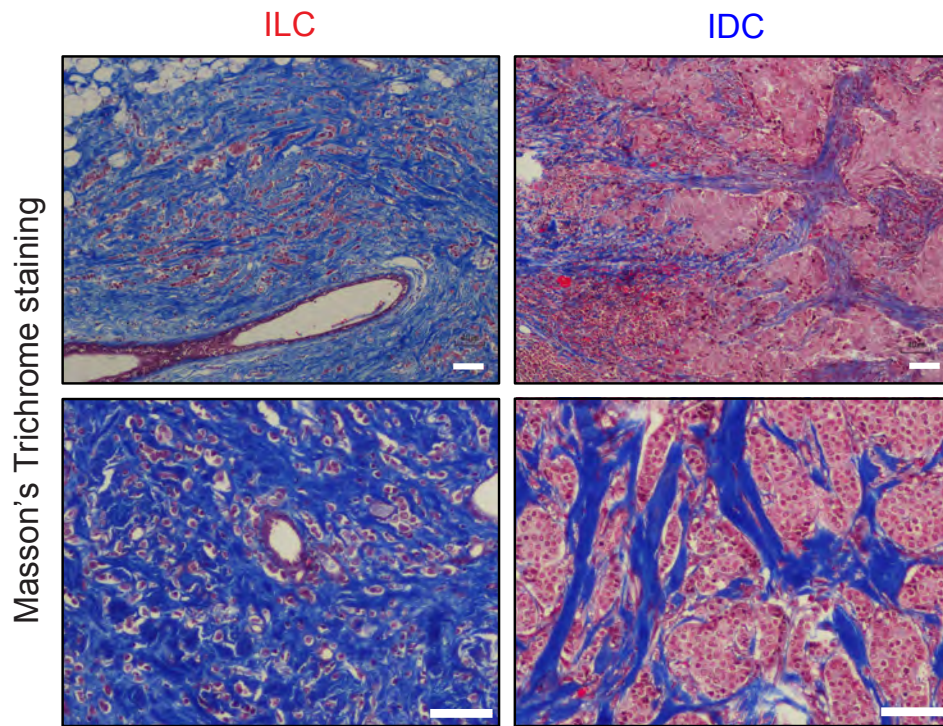

**Figure S4. Higher Collagen deposition in human ILC versus IDC tumors.** ILC (red; left) and IDC (blue; right) tumors from a tissue microarray stained with Masson's Trichrome. Cytoplasm and muscle fibers stain red, whereas Collagen displays blue coloration. Scale bar: 100  $\mu$ m.

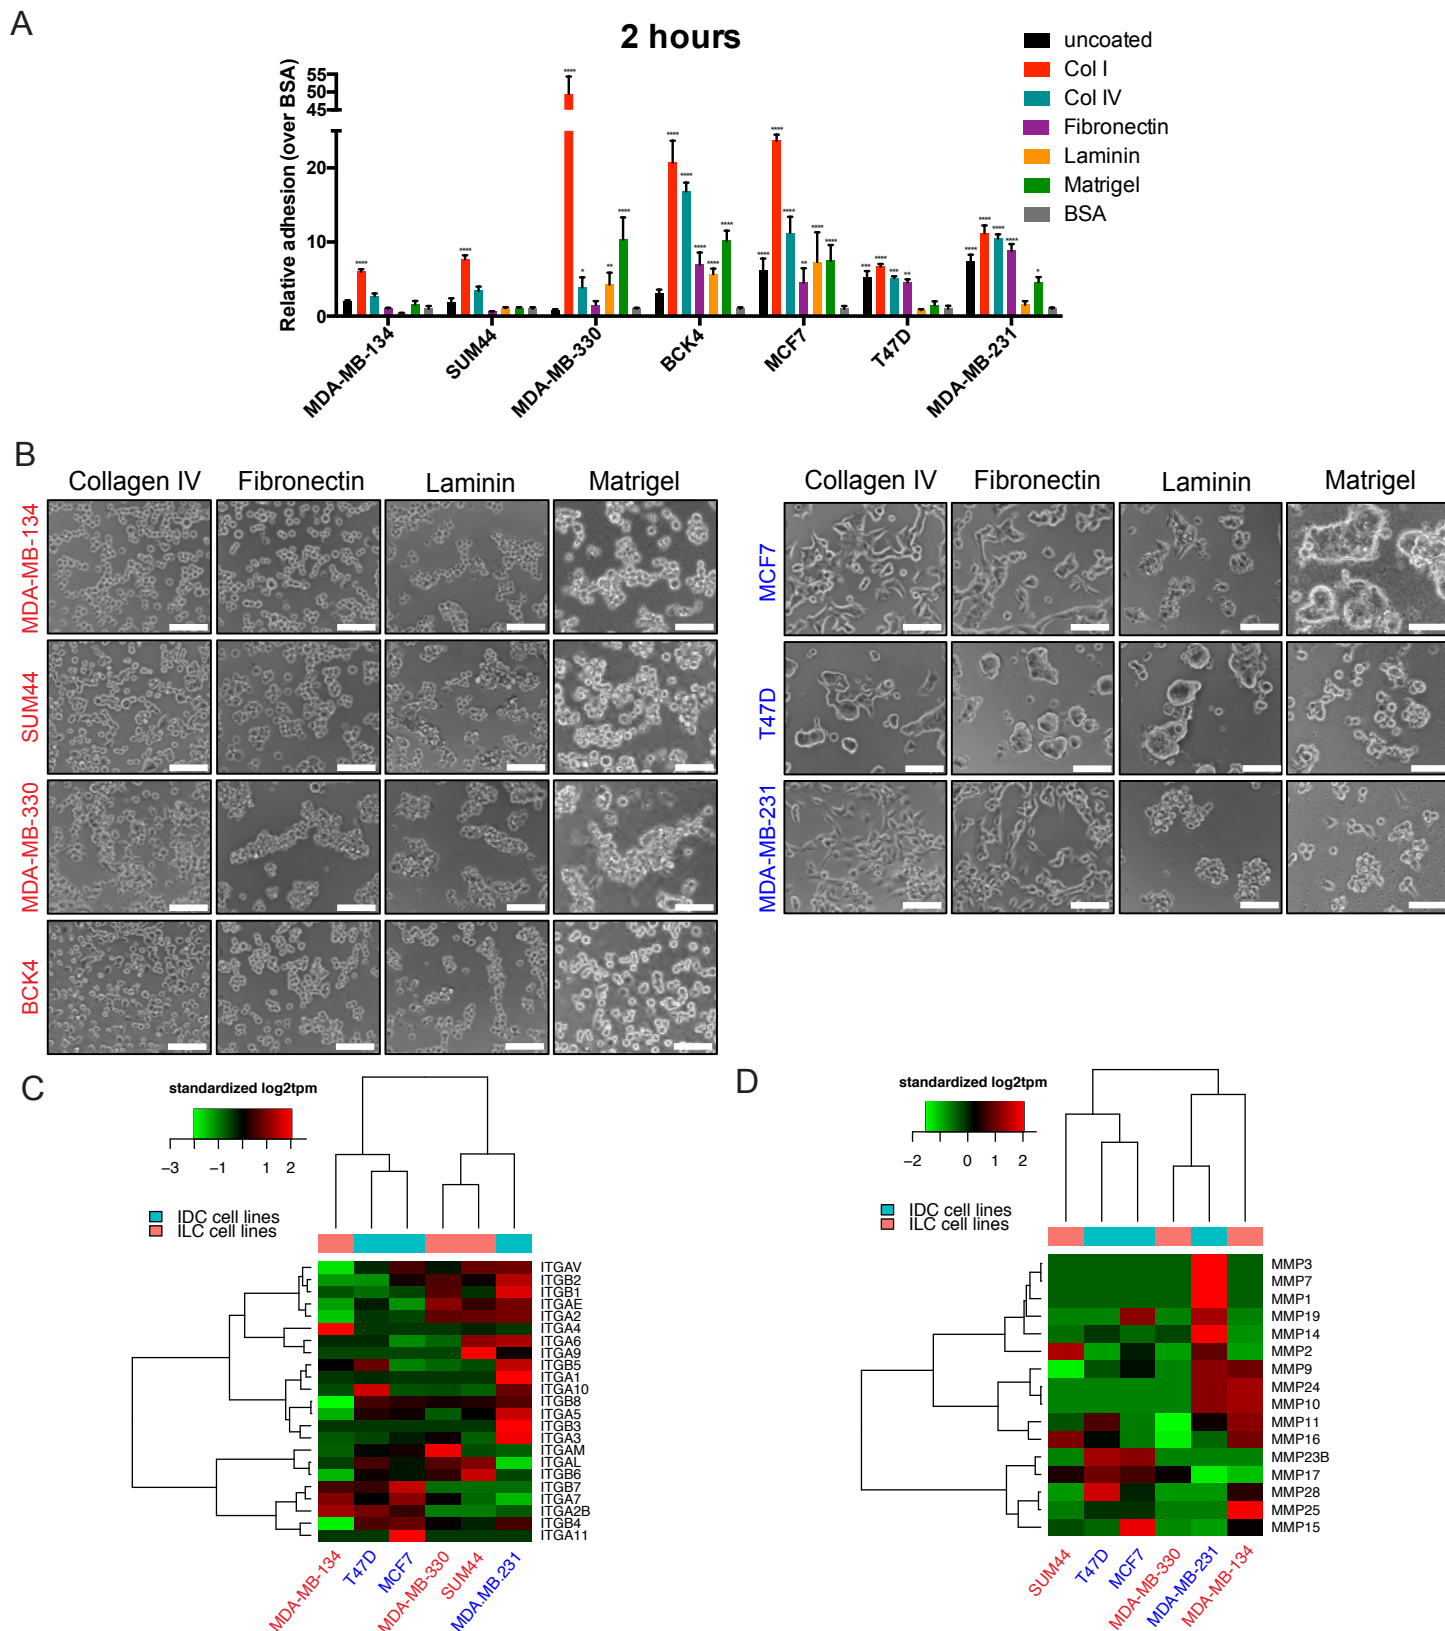

**Figure S5. Adhesion of human ILC and IDC cell lines to different ECM proteins.** **A.** Fold adhesion (normalized to BSA) of ILC (red) and IDC (blue) cell lines 2 hours post-plating. Graphs show representative data from two experiments ( $n=4$ ).  $p$ -values are from ordinary one-way ANOVA with Dunnett's multiple comparison test to BSA for each cell line. \*  $p \leq 0.05$ ; \*\*  $p \leq 0.01$ ; \*\*\*\*  $p \leq 0.0001$ . **B.** Phase contrast light microscopy images of ILC (red; left) and IDC (blue; right) cell lines in plates with the indicated coatings 16 hours post-plating. Scale bar: 100  $\mu$ m. **C-D.** Unsupervised hierarchical clustering heat map of **(C)** integrin and **(D)** MMP expression in ILC (red) and IDC (blue) cell lines.

A

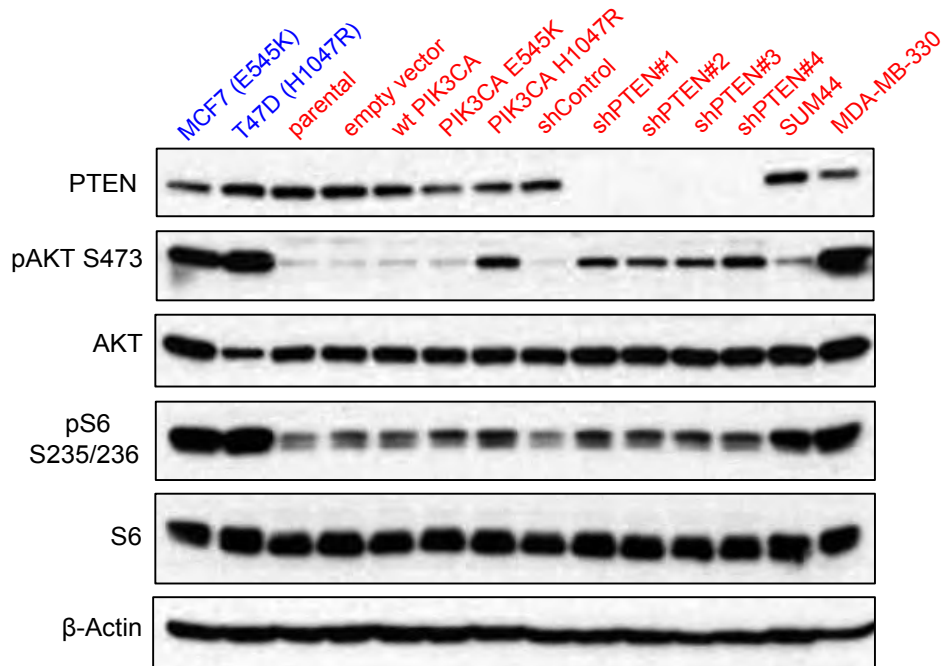

B

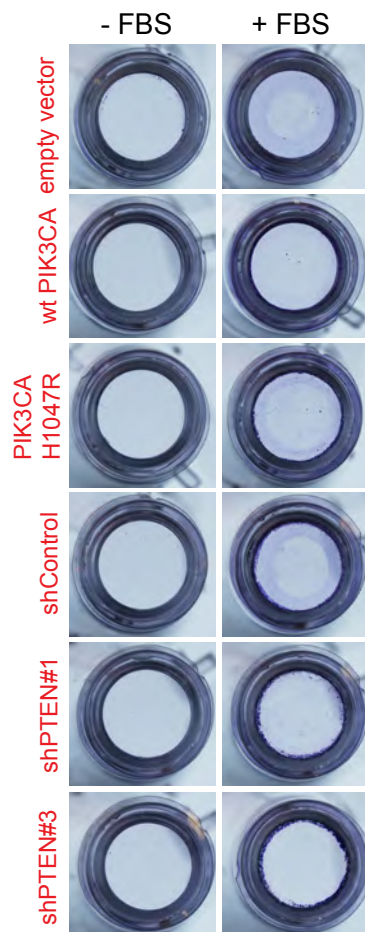

C

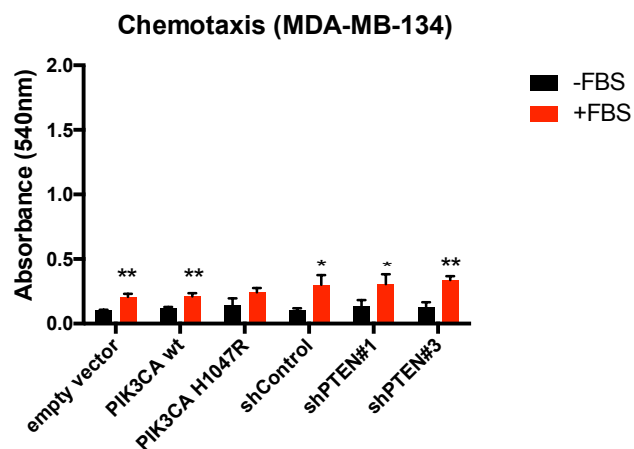

D

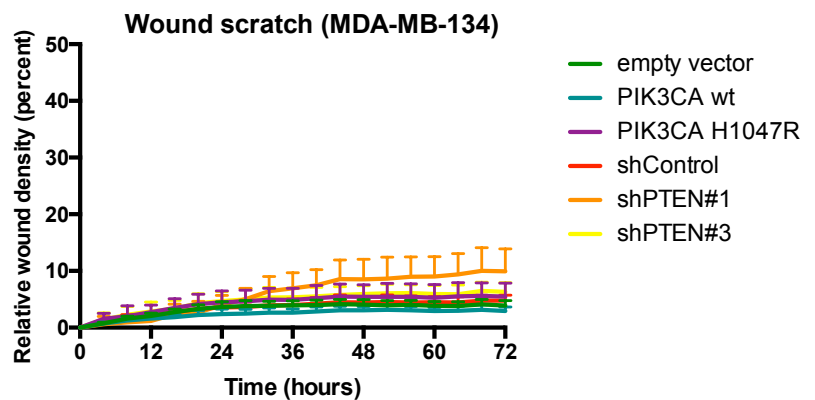

**Figure S6. Overexpression of PIK3CA mutants and PTEN knockdown in MDA-MB-134 cells activate downstream PI3K/Akt signaling but do not enhance cell migration. A.** Western blotting using the indicated antibodies on whole cell lysates from ILC (red) and IDC (blue) cell lines. β-Actin was used as a loading control. MDA-MB-330 cells harbor HER2 amplification. **B-C.** (B) Images of inserts and (C) quantification of haptotaxis in the indicated conditions (n=3). p-values are from unpaired t-test. \* p ≤ 0.05; \*\* p ≤ 0.01. **D.** Relative wound densities from the indicated conditions (n=6-8).

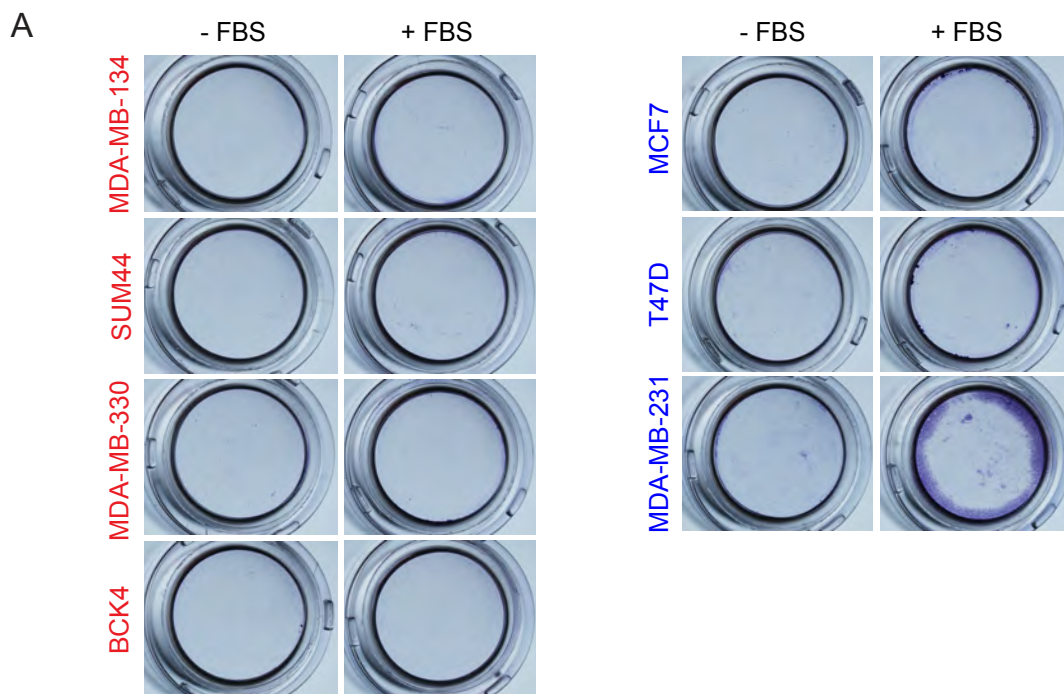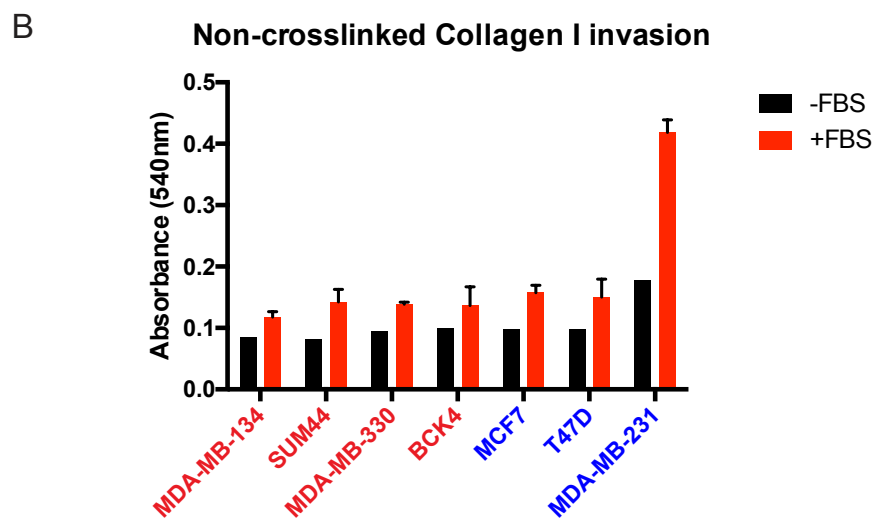

**Figure S7. Human ILC cell lines do not exhibit substantial invasion of non-crosslinked Collagen I in transwell Boyden chamber assays. A-B.** (A) Images of inserts and (B) quantification of amoeboid invasion of non-crosslinked Collagen I (n=1-2) in ILC (red; left) and IDC (blue; right) cell lines.

A

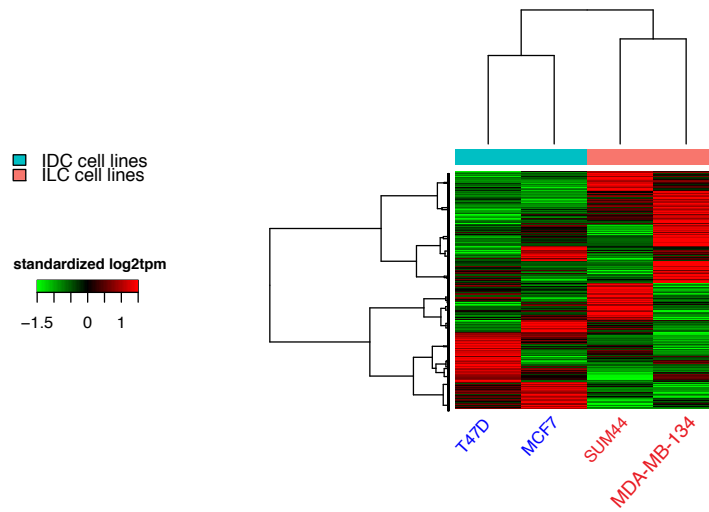

B

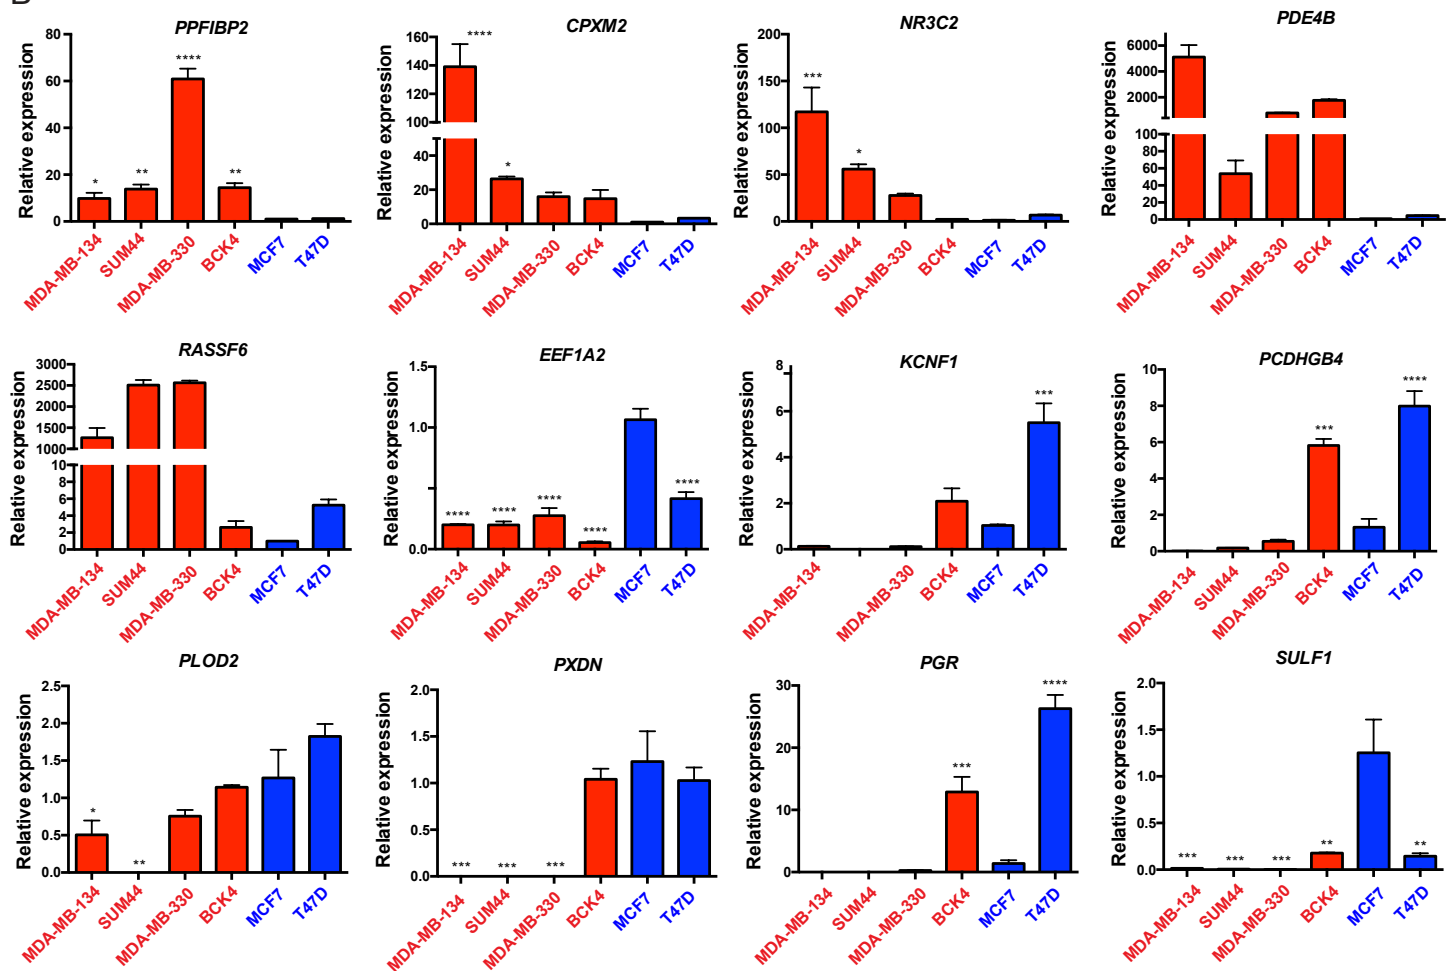

**Figure S8. Differentially expressed genes between human ILC and IDC cell lines and tumors.**

**A.** Unsupervised clustering heat map of ILC (red) and IDC (blue) cell lines using top 1,000 differentially regulated genes. **B.** qRT-PCRs for the ILC-differentially regulated genes in the human ILC (red) and IDC (blue) cell lines. RNA-Seq data from MDA-MB-330 cells was analyzed to see which genes were also differentially expressed in this cell line and primers were used to measure the expression of these genes in all ER+ ILC and IDC cell lines by qPCR. Graphs show expression data from two biological replicates relative to MCF7. p-values are from ordinary one-way ANOVA with Dunnett's multiple comparison test to MCF7. \*  $p \leq 0.05$ ; \*\*  $p \leq 0.01$ ; \*\*\*  $p \leq 0.001$ ; \*\*\*\*  $p \leq 0.0001$ . p-values could not be obtained for PDE4B and RASSF6 as they could only be detected in one MCF7 biological replicate.
